## CORRECTION

# Bicaudal C1 promotes pancreatic NEUROG3<sup>+</sup> endocrine progenitor differentiation and ductal morphogenesis

**Laurence A. Lemaire, Joan Goulley, Yung Hae Kim, Solenne Carat, Patrick Jacquemin, Jacques Rougemont, Daniel B. Constam and Anne Grapin-Botton**

There were errors published in *Development* **142**, 858-870.

In the supplementary information, the sequences of four of the primers shown in Table S2 were incorrect. The correct sequences of these primers are as follows (5'-3'):

*Hes1* mRNA reverse primer, gcgcggtattccccaaca;

*Onecut1* mRNA forward primer, agtccagcgcgatgtcgg;

*Onecut1* mRNA reverse primer, ttttgggggtgttcctct;

*Tcf7* mRNA reverse primer, agtcatagtacttggcctgctcttc.

The authors apologise to readers for these mistakes.
